# Supplementary material for: Emergence of dominant toxigenic M1T1 Streptococcus pyogenes clone during increased scarlet fever activity in England: a population-based molecular epidemiological study
Source: PubMed Central journal article supplement (PMC6838661; doi:10.1016/s1473-3099(19)30446-3), 2019-11
Supplement: mmc1.pdf [file mmc1.pdf]

# THE LANCET

## Infectious Diseases

### Supplementary appendix

This appendix formed part of the original submission and has been peer reviewed. We post it as supplied by the authors.

Supplement to: Lynskey NN, Jauneikaite E, Li HK, et al. Emergence of dominant toxigenic M1T1 *Streptococcus pyogenes* clone during increased scarlet fever activity in England: a population-based molecular epidemiological study. *Lancet Infect Dis* 2019; published online Sept 10. [http://dx.doi.org/10.1016/S1473-3099\(19\)30446-3](http://dx.doi.org/10.1016/S1473-3099(19)30446-3).

1  
2  
3  
4  
5  
6  
7  
8  
9  
10  
11  
12  
13  
14  
15  
16  
17  
18  
19  
20  
21  
22  
23  
24  
25  
26  
27  
28  
29  
30  
31

**SUPPLEMENTARY APPENDIX**

**Emergence of dominant toxigenic MIT1 *Streptococcus pyogenes* clone during increased scarlet fever activity in England: a population-based molecular epidemiological study**

Nicola N Lynskey<sup>1\*</sup>, Elita Jauneikaite<sup>1,2,3\*</sup>, Ho Kwong Li<sup>1</sup>, Xiangyun Zhi<sup>1</sup>, Claire E Turner<sup>4</sup>, Mia Mosavi<sup>1,3</sup>, Max Pearson<sup>1,3</sup>, Masanori Asai<sup>1</sup>, Ludmila Lobkowicz<sup>1</sup>, J. Yimmy Chow<sup>3,5</sup>, Julian Parkhill<sup>3,6</sup>, Theresa Lamagni<sup>3,7</sup> Victoria J Chalker<sup>3,7</sup>, Shiranee Sriskandan<sup>1,3</sup>

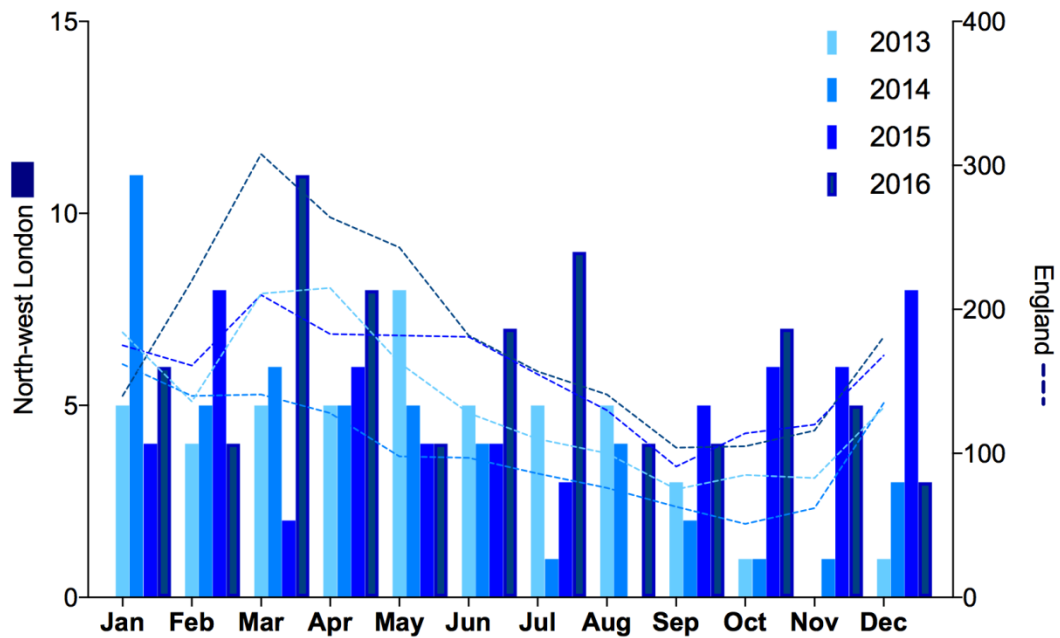

32

33 **S1. Local and national invasive *S. pyogenes* infection notifications 2013-2016**

34 Monthly numbers of notified cases of invasive *S. pyogenes* infections reported in northwest London (bars,  
 35 left axis), and nationally (dashed lines, right axis). Surge of invasive *S. pyogenes* notifications in 2016  
 36 coincided with expansion of invasive isolates in M1<sub>UK</sub> lineage.

37

Tree scale: 0.01 |—|

**M1-lineage**

- M1uk
- M1global

**Sample type**

- Scarlet fever
- URT
- non-URT

**Age groups**

- young child (<8yrs)
- older child (9 to 18yrs)
- adult (>19yrs)

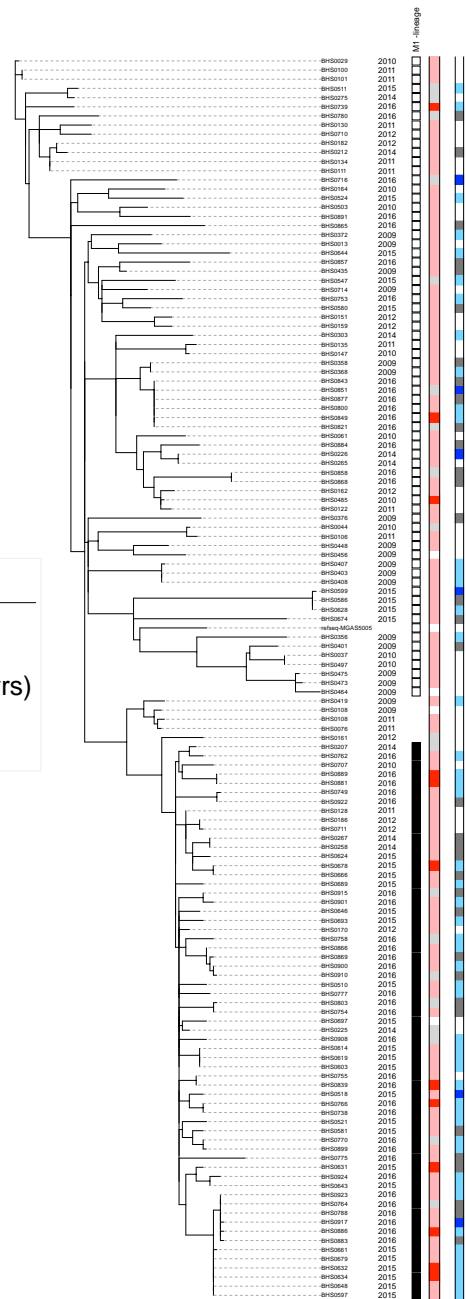

38  
39  
40

**S2. Population structure of the non-invasive *emm1* *S. pyogenes*.**

41 Maximum likelihood rooted phylogenetic tree constructed from core SNPs (excluding prophage regions) of  
 42 *emm1* non-invasive isolates collected in North-West London between 2009-2016 (n=135). Year of isolation,  
 43 M1 lineage, non-invasive sample type, mention of scarlet fever, and age group are indicated in individual  
 44 columns; gaps indicate no clinical information was available. An empty square without borders in the M1  
 45 lineage column indicates intermediate isolates (n=5) with 13 or 23SNPs (including 3 *rofA* mutations) of the  
 46 27SNPs that define the M1<sub>UK</sub> lineage; none of the M1<sub>global</sub> strains had these 3 *rofA* mutations. Scale bar  
 47 indicates nucleotide substitutions per site.

48

49

50

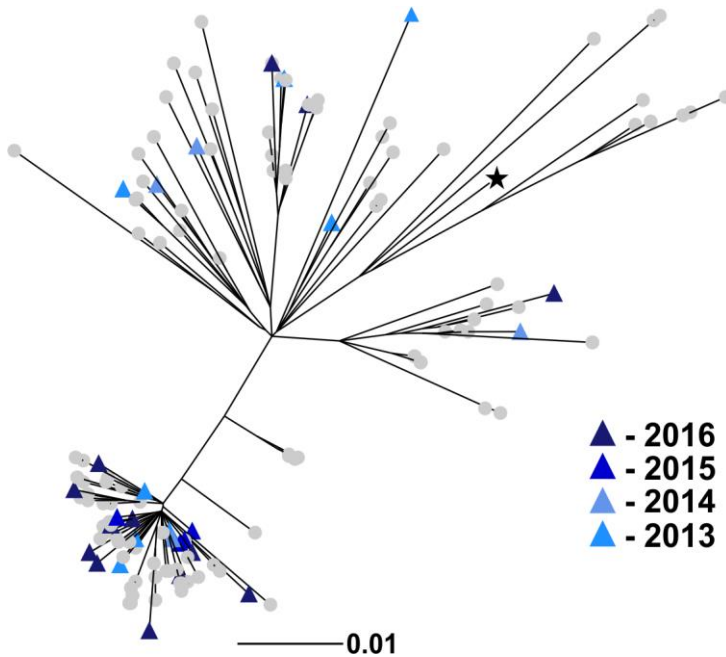

51

52 **S3. Phylogenetic relationship between invasive and non-invasive *emm1* *S. pyogenes* isolates in**  
53 **northwest London.**

54 Maximum likelihood phylogenetic tree constructed from core SNPs (excluding prophage regions) comparing  
55 *emm1* non-invasive isolates grey circles collected in northwest London in 2009-2016 (n=135 Jan-Dec 2009-  
56 2013; March-May 2014-2016) with contemporaneous invasive isolates from the same region, blue triangles,  
57 (n=31, March-May 2013-2016), shading according to year. Strains from the M1<sub>UK</sub> emergent lineage were  
58 responsible for both non-invasive and invasive infections with some indistinguishable strains. Star; reference  
59 strain MGAS5005. Scale bar represents nucleotide substitutions per site.

60

61

62

63

64

65

66

67

68

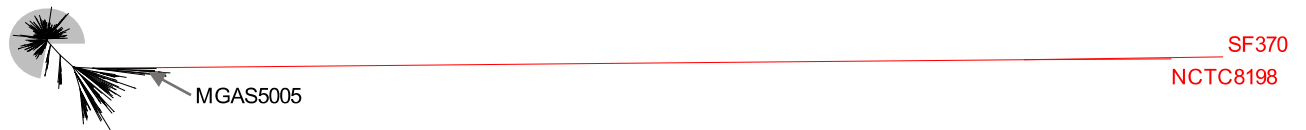

69

70

71 **S4 Population structure of *emm1* isolates from UK in comparison to historical scarlet**  
72 **fever reference strains SF370 and NCTC8198.**

73 Maximum likelihood unrooted phylogenetic tree constructed from core SNPs (excluding prophage regions)  
74 comparing UK sterile site *S. pyogenes emm1* sequences from 2013-2016 (n=552) and non-invasive North-  
75 West London *S. pyogenes emm1* sequences 2009-2016 (n=135) with scarlet fever isolates SF370 (AE004092)  
76 (SpeC-positive) and NCTC8198 (LN831034)(SpeA-positive). Scale bar indicates nucleotide substitutions  
77 per site.

78

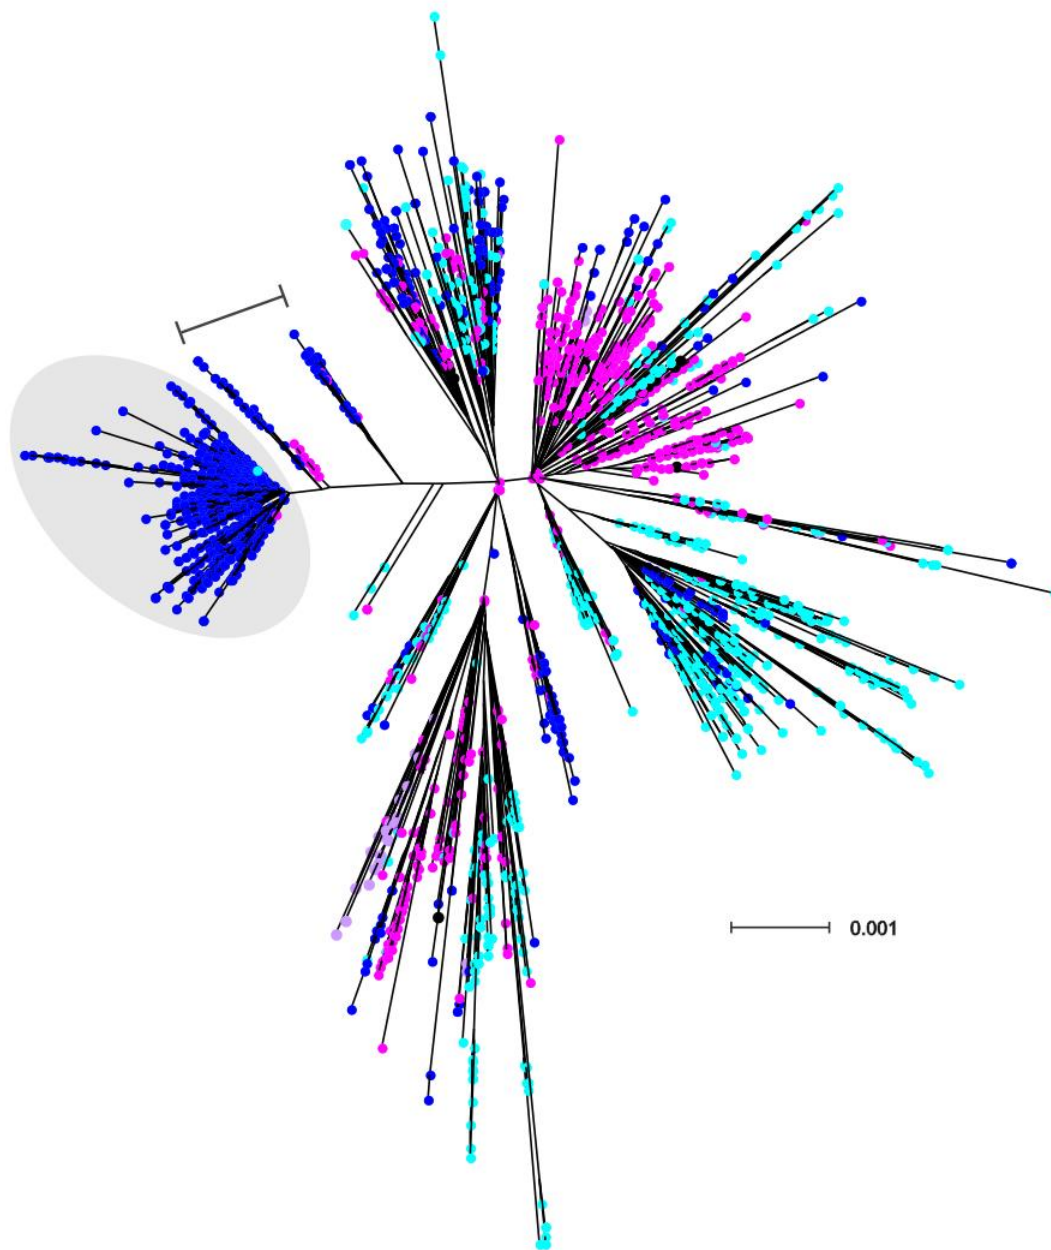

79

80 **S5. Emergent M1<sub>UK</sub> lineage in a global context.**

81 Maximum likelihood unrooted phylogenetic tree constructed from core SNPs (excluding prophage regions)  
 82 comparing all sequenced UK *emm1* isolates (blue) with the global *emm1* population: North America  
 83 (turquoise), Nordic countries (pink), and Asia (lilac) as shown in Figure 5B (n=2800 isolates). Shading in  
 84 grey indicates the emergent lineage M1<sub>UK</sub>. While UK and international *emm1* isolates arise throughout the  
 85 tree, isolates within the M1<sub>UK</sub> lineage are exclusively from UK, bar two single isolates from Denmark and  
 86 USA (brought forwards for clarity). Straight line marker indicates branches representing  
 87 intermediate isolates with 13-23SNPs (including 3 *rofA* mutations) of the 27SNPs identified in M1<sub>UK</sub> lineage  
 88 strains. Other isolates did not have the 3 specific *rofA* mutations identified. Scale bar indicates nucleotide  
 89 substitutions per site.

90 **Supplementary table 1: M1<sub>UK</sub> Lineage-associated SNPs**

91

| Position in MGAS5005 | Gene locus    | Gene  | Product                                       | S/NS | Ref | SNP |
|----------------------|---------------|-------|-----------------------------------------------|------|-----|-----|
| 115646               | M5005_Spy0106 | rofA  | Transcriptional regulator                     | NS   | C   | T   |
| 116162               | M5005_Spy0106 | rofA  | Transcriptional regulator                     | NS   | A   | C   |
| 116163               | M5005_Spy0106 | rofA  | Transcriptional regulator                     | NS   | C   | A   |
| 250832               | M5005_Spy0243 |       | ABC transporter-associated protein            | S    | T   | C   |
| 513254               | M5005_Spy0525 |       | galactose-6-phosphate isomerase LacB subunit  | NS   | G   | T   |
| 528360               | Intergenic    |       | -                                             | -    | A   | T   |
| 563631               | M5005_Spy0566 | sagE  | streptolysin S putative self-immunity protein | NS   | G   | A   |
| 613633               | M5005_Spy0609 |       | phosphoglycerol transferase                   | NS   | T   | C   |
| 626494               | M5005_Spy0623 |       | methyltransferase                             | S    | G   | A   |
| 661707               | M5005_Spy0656 | trmD  | tRNA (guanine-N(1)-)-methyltransferase        | NS   | G   | A   |
| 730823               | M5005_Spy0727 | recJ  | single-stranded-DNA-specific exonuclease      | NS   | C   | T   |
| 784467               | M5005_Spy0779 |       | putative membrane spanning protein            | S    | T   | C   |
| 819098               | M5005_Spy0825 | murB  | UDP-N-acetylenolpyruvoylglucosamine reductase | NS   | G   | A   |
| 923079               | M5005_Spy0933 |       | putative NADH-dependent flavin oxidoreductase | NS   | G   | A   |
| 942633               | M5005_Spy0951 | pstB  | phosphate transport ATP-binding protein       | NS   | G   | T   |
| 983438               | Intergenic    |       | -                                             | -    | G   | C   |
| 1082253              | M5005_Spy1108 | metK2 | S-adenosylmethionine synthetase               | NS   | C   | T   |
| 1238124              | M5005_Spy1282 | msrA  | peptide methionine sulfoxide reductase        | NS   | G   | A   |
| 1238673              | M5005_Spy1283 | tlpA  | thiol:disulfide interchange protein           | NS   | G   | A   |
| 1251193              | M5005_Spy1293 |       | hypothetical protein                          | NS   | G   | A   |
| 1373176              | M5005_Spy1400 |       | PTS system, galactose-specific IIB component  | NS   | C   | A   |
| 1407497              | M5005_Spy1439 |       | portal protein                                | NS   | C   | T   |
| 1446116              | M5005_Spy1490 |       | 3-oxoacyl-[acyl-carrier protein] reductase    | S    | C   | T   |
| 1535209              | Intergenic    |       | -                                             | -    | A   | G   |
| 1702540              | M5005_Spy1714 | gldA  | glycerol dehydrogenase                        | STOP | C   | T   |
| 1734749              | M5005_Spy1772 |       | glutamate formimidoyltransferase              | NS   | G   | A   |
| 1828734              | M5005_Spy1860 |       | putative membrane spanning protein            | NS   | G   | A   |

92 S denotes synonymous mutation; NS denotes non-synonymous mutation; STOP denotes a nonsense

93 mutation; Reference strain used is MGAS5005

94



95  
96  
97

**Supplementary table 2: Non-invasive *S. pyogenes emm1* strains isolated in North-West London 2009-2016 that underwent whole genome sequencing as part of this study (n=135)**

| ENA               | Strain         | Lineage                    | Year         |
|-------------------|----------------|----------------------------|--------------|
| <b>ERS1020045</b> | <b>BHS0013</b> | <b>M1<sub>global</sub></b> | <b>2009*</b> |
| ERS1020076        | BHS0029        | M1 <sub>global</sub>       | 2010*        |
| <b>ERS1020092</b> | <b>BHS0037</b> | <b>M1<sub>global</sub></b> | <b>2010*</b> |
| ERS1020107        | BHS0044        | M1 <sub>global</sub>       | 2010         |
| ERS1020141        | BHS0061        | M1 <sub>global</sub>       | 2010*        |
| ERS1020171        | BHS0076        | M1 <sub>inter</sub>        | 2011*        |
| ERS1020034        | BHS0100        | M1 <sub>global</sub>       | 2011*        |
| ERS1020036        | BHS0101        | M1 <sub>global</sub>       | 2011*        |
| ERS1020046        | BHS0106        | M1 <sub>global</sub>       | 2011*        |
| <b>ERS1020050</b> | <b>BHS0108</b> | <b>M1<sub>inter</sub></b>  | <b>2011*</b> |
| ERS1020056        | BHS0111        | M1 <sub>global</sub>       | 2011*        |
| ERS1020079        | BHS0122        | M1 <sub>global</sub>       | 2011*        |
| <b>ERS1020090</b> | <b>BHS0128</b> | <b>M1<sub>UK</sub></b>     | <b>2011*</b> |
| <b>ERS1020095</b> | <b>BHS0130</b> | <b>M1<sub>global</sub></b> | <b>2011*</b> |
| ERS1020102        | BHS0134        | M1 <sub>global</sub>       | 2011*        |
| <b>ERS1020104</b> | <b>BHS0135</b> | <b>M1<sub>global</sub></b> | <b>2011*</b> |
| ERS1020128        | BHS0147        | M1 <sub>global</sub>       | 2010*        |
| <b>ERS1020136</b> | <b>BHS0151</b> | <b>M1<sub>global</sub></b> | <b>2012*</b> |
| ERS1020152        | BHS0159        | M1 <sub>global</sub>       | 2012*        |
| ERS1020156        | BHS0161        | M1 <sub>inter</sub>        | 2012         |
| <b>ERS1020158</b> | <b>BHS0162</b> | <b>M1<sub>global</sub></b> | <b>2012*</b> |
| ERS1020162        | BHS0164        | M1 <sub>global</sub>       | 2010*        |
| <b>ERS1020174</b> | <b>BHS0170</b> | <b>M1<sub>UK</sub></b>     | <b>2012*</b> |
| ERS1020199        | BHS0182        | M1 <sub>global</sub>       | 2012*        |
| ERS1020207        | BHS0186        | M1 <sub>UK</sub>           | 2012*        |
| ERS1020240        | BHS0207        | M1 <sub>UK</sub>           | 2014         |
| ERS1020250        | BHS0212        | M1 <sub>global</sub>       | 2014*        |
| ERS1020275        | BHS0225        | M1 <sub>UK</sub>           | 2014         |
| ERS1020277        | BHS0226        | M1 <sub>global</sub>       | 2014*        |
| <b>ERS1020341</b> | <b>BHS0258</b> | <b>M1<sub>UK</sub></b>     | <b>2014*</b> |
| ERS1020354        | BHS0265        | M1 <sub>global</sub>       | 2014*        |
| ERS1020358        | BHS0267        | M1 <sub>UK</sub>           | 2014*        |

|                   |                |                            |              |
|-------------------|----------------|----------------------------|--------------|
| ERS1020374        | BHS0275        | M1 <sub>global</sub>       | 2014         |
| <b>ERS1020253</b> | <b>BHS0303</b> | <b>M1<sub>global</sub></b> | <b>2014*</b> |
| ERS1020361        | BHS0356        | M1 <sub>global</sub>       | 2009*        |
| ERS1020365        | BHS0358        | M1 <sub>global</sub>       | 2009*        |
| ERS1020385        | BHS0368        | M1 <sub>global</sub>       | 2009*        |
| ERS1020393        | BHS0372        | M1 <sub>global</sub>       | 2009*        |
| ERS1020398        | BHS0376        | M1 <sub>global</sub>       | 2009*        |
| ERS1020429        | BHS0401        | M1 <sub>global</sub>       | 2009*        |
| ERS1020433        | BHS0403        | M1 <sub>global</sub>       | 2009*        |
| ERS1020441        | BHS0407        | M1 <sub>global</sub>       | 2009*        |
| ERS1020443        | BHS0408        | M1 <sub>global</sub>       | 2009*        |
| ERS1020465        | BHS0419        | M1 <sub>inter</sub>        | 2009*        |
| ERS1020497        | BHS0435        | M1 <sub>global</sub>       | 2009*        |
| ERS1020523        | BHS0448        | M1 <sub>global</sub>       | 2009*        |
| ERS1020539        | BHS0456        | M1 <sub>global</sub>       | 2009         |
| ERS1020551        | BHS0462        | M1 <sub>inter</sub>        | 2009         |
| ERS1020555        | BHS0464        | M1 <sub>global</sub>       | 2009         |
| ERS1020572        | BHS0473        | M1 <sub>global</sub>       | <b>2009*</b> |
| ERS1020576        | BHS0475        | M1 <sub>global</sub>       | 2009*        |
| ERS1020435        | BHS0485        | M1 <sub>global</sub>       | 2010*        |
| <b>ERS1020460</b> | <b>BHS0497</b> | <b>M1<sub>global</sub></b> | <b>2010*</b> |
| ERS1020472        | BHS0503        | M1 <sub>global</sub>       | 2010*        |
| <b>ERS1020486</b> | <b>BHS0510</b> | <b>M1<sub>UK</sub></b>     | <b>2015*</b> |
| ERS1020488        | BHS0511        | M1 <sub>global</sub>       | 2015         |
| ERS1020502        | BHS0518        | M1 <sub>UK</sub>           | 2015*        |
| <b>ERS1020508</b> | <b>BHS0521</b> | <b>M1<sub>UK</sub></b>     | <b>2015*</b> |
| <b>ERS1020514</b> | <b>BHS0524</b> | <b>M1<sub>global</sub></b> | <b>2015*</b> |
| ERS1020561        | BHS0547        | M1 <sub>global</sub>       | 2015         |
| ERS1020602        | BHS0580        | M1 <sub>global</sub>       | 2015*        |
| <b>ERS1020603</b> | <b>BHS0581</b> | <b>M1<sub>UK</sub></b>     | <b>2015*</b> |
| ERS1020613        | BHS0586        | M1 <sub>global</sub>       | 2015*        |
| ERS1020634        | BHS0597        | M1 <sub>UK</sub>           | 2015*        |
| ERS1020638        | BHS0599        | M1 <sub>global</sub>       | 2015*        |
| ERS1020646        | BHS0603        | M1 <sub>UK</sub>           | 2015*        |
| ERS1020668        | BHS0614        | M1 <sub>UK</sub>           | 2015*        |

|                   |                |                            |              |
|-------------------|----------------|----------------------------|--------------|
| ERS1020679        | BHS0619        | M1 <sub>UK</sub>           | 2015*        |
| ERS1020688        | BHS0624        | M1 <sub>UK</sub>           | 2015*        |
| ERS1020696        | BHS0628        | M1 <sub>global</sub>       | 2015*        |
| <b>ERS1020702</b> | <b>BHS0631</b> | <b>M1<sub>UK</sub></b>     | <b>2015*</b> |
| ERS1020703        | BHS0632        | M1 <sub>UK</sub>           | 2015*        |
| ERS1020705        | BHS0634        | M1 <sub>UK</sub>           | 2015*        |
| <b>ERS1020714</b> | <b>BHS0643</b> | <b>M1<sub>UK</sub></b>     | <b>2015*</b> |
| ERS1020715        | BHS0644        | M1 <sub>global</sub>       | 2015*        |
| ERS1020717        | BHS0646        | M1 <sub>UK</sub>           | 2015*        |
| ERS1020719        | BHS0648        | M1 <sub>UK</sub>           | 2015*        |
| ERS1020732        | BHS0661        | M1 <sub>UK</sub>           | 2015*        |
| ERS1020604        | BHS0666        | M1 <sub>UK</sub>           | 2015*        |
| <b>ERS1020620</b> | <b>BHS0674</b> | <b>M1<sub>global</sub></b> | <b>2015*</b> |
| ERS1020629        | BHS0678        | M1 <sub>UK</sub>           | 2015*        |
| ERS1020631        | BHS0679        | M1 <sub>UK</sub>           | 2015*        |
| ERS1020651        | BHS0689        | M1 <sub>UK</sub>           | 2015*        |
| ERS1020659        | BHS0693        | M1 <sub>UK</sub>           | 2015*        |
| ERS1020667        | BHS0697        | M1 <sub>UK</sub>           | 2015         |
| ERS1020687        | BHS0707        | M1 <sub>UK</sub>           | 2010*        |
| ERS1020692        | BHS0710        | M1 <sub>global</sub>       | 2012*        |
| <b>ERS1020694</b> | <b>BHS0711</b> | <b>M1<sub>UK</sub></b>     | <b>2012*</b> |
| ERS1020701        | BHS0714        | M1 <sub>global</sub>       | <b>2009*</b> |
| ERS1463073        | BHS0716        | M1 <sub>global</sub>       | 2016         |
| ERS1463078        | BHS0738        | M1 <sub>UK</sub>           | 2016*        |
| ERS1463079        | BHS0739        | M1 <sub>global</sub>       | 2016*        |
| ERS1463083        | BHS0749        | M1 <sub>UK</sub>           | 2016*        |
| ERS1463084        | BHS0753        | M1 <sub>global</sub>       | 2016*        |
| ERS1463085        | BHS0754        | M1 <sub>UK</sub>           | 2016*        |
| ERS1463086        | BHS0755        | M1 <sub>UK</sub>           | 2016*        |
| ERS1463087        | BHS0758        | M1 <sub>UK</sub>           | 2016         |
| ERS1463088        | BHS0762        | M1 <sub>UK</sub>           | 2016*        |
| ERS1463089        | BHS0764        | M1 <sub>UK</sub>           | 2016         |
| ERS1463090        | BHS0766        | M1 <sub>UK</sub>           | 2016*        |
| ERS1463091        | BHS0770        | M1 <sub>UK</sub>           | 2016         |
| ERS1463092        | BHS0775        | M1 <sub>UK</sub>           | 2016*        |

|            |         |                      |       |
|------------|---------|----------------------|-------|
| ERS1463093 | BHS0777 | M1 <sub>UK</sub>     | 2016* |
| ERS1463095 | BHS0780 | M1 <sub>global</sub> | 2016  |
| ERS1463096 | BHS0788 | M1 <sub>UK</sub>     | 2016* |
| ERS1463100 | BHS0800 | M1 <sub>global</sub> | 2016* |
| ERS1463101 | BHS0803 | M1 <sub>UK</sub>     | 2016  |
| ERS1463102 | BHS0821 | M1 <sub>global</sub> | 2016  |
| ERS1463104 | BHS0839 | M1 <sub>UK</sub>     | 2016* |
| ERS1463105 | BHS0843 | M1 <sub>global</sub> | 2016* |
| ERS1463106 | BHS0849 | M1 <sub>global</sub> | 2016* |
| ERS1463107 | BHS0851 | M1 <sub>global</sub> | 2016  |
| ERS1463108 | BHS0857 | M1 <sub>global</sub> | 2016* |
| ERS1463109 | BHS0858 | M1 <sub>global</sub> | 2016  |
| ERS1463110 | BHS0865 | M1 <sub>global</sub> | 2016* |
| ERS1463111 | BHS0866 | M1 <sub>UK</sub>     | 2016* |
| ERS1463112 | BHS0868 | M1 <sub>global</sub> | 2016* |
| ERS1463113 | BHS0869 | M1 <sub>UK</sub>     | 2016* |
| ERS1463114 | BHS0877 | M1 <sub>global</sub> | 2016* |
| ERS1463115 | BHS0881 | M1 <sub>UK</sub>     | 2016* |
| ERS1463116 | BHS0883 | M1 <sub>UK</sub>     | 2016* |
| ERS1463117 | BHS0884 | M1 <sub>global</sub> | 2016* |
| ERS1463118 | BHS0886 | M1 <sub>UK</sub>     | 2016* |
| ERS1463119 | BHS0889 | M1 <sub>UK</sub>     | 2016* |
| ERS1463120 | BHS0891 | M1 <sub>global</sub> | 2016* |
| ERS1463121 | BHS0899 | M1 <sub>UK</sub>     | 2016* |
| ERS1463122 | BHS0900 | M1 <sub>UK</sub>     | 2016* |
| ERS1463123 | BHS0901 | M1 <sub>UK</sub>     | 2016* |
| ERS1463124 | BHS0908 | M1 <sub>UK</sub>     | 2016  |
| ERS1463125 | BHS0910 | M1 <sub>UK</sub>     | 2016  |
| ERS1463126 | BHS0915 | M1 <sub>UK</sub>     | 2016  |
| ERS1463127 | BHS0917 | M1 <sub>UK</sub>     | 2016* |
| ERS1463129 | BHS0922 | M1 <sub>UK</sub>     | 2016* |
| ERS1463130 | BHS0923 | M1 <sub>UK</sub>     | 2016* |
| ERS1463131 | BHS0924 | M1 <sub>UK</sub>     | 2016* |

98  
99  
100

Grey shading with bold font denotes isolates used for SpeA expression analysis;

M1<sub>inter</sub> indicates intermediate isolate

\* Upper respiratory tract (URT) strains. 2014-2016 isolates were collected for sequencing March-May

101 **Supplementary table 3: *Emm1 S. pyogenes* isolated from invasive disease cases England and Wales**  
 102 **March-May of 2013 and 2016 that underwent whole genome sequencing as part of this study (n=446;**  
 103 **of which 425 were sterile site)**

| ENA        | Isolate   | Sterile site<br>(yes/no) | Year              |
|------------|-----------|--------------------------|-------------------|
| ERS1594710 | PHEGAS001 | Yes                      | 2013              |
| ERS1594711 | PHEGAS002 | Yes                      | 2013              |
| ERS1594712 | PHEGAS003 | Yes                      | 2013              |
| ERS1594713 | PHEGAS004 | Yes                      | 2013              |
| ERS1594714 | PHEGAS005 | Yes                      | 2013              |
| ERS1594715 | PHEGAS006 | Yes                      | 2013              |
| ERS1594716 | PHEGAS007 | Yes                      | 2013              |
| ERS1594717 | PHEGAS008 | No                       | 2013              |
| ERS1594718 | PHEGAS009 | Yes                      | 2013              |
| ERS1594719 | PHEGAS010 | Yes                      | 2013              |
| ERS1594720 | PHEGAS011 | Yes                      | 2013              |
| ERS1594721 | PHEGAS012 | Yes                      | 2013              |
| ERS1594722 | PHEGAS013 | Yes                      | 2013              |
| ERS1594723 | PHEGAS014 | Yes                      | 2013              |
| ERS1594724 | PHEGAS015 | Yes                      | 2013              |
| ERS1594725 | PHEGAS016 | Yes                      | 2013              |
| ERS1594726 | PHEGAS017 | Yes                      | 2013              |
| ERS1594727 | PHEGAS018 | Yes                      | 2013              |
| ERS1594728 | PHEGAS019 | Yes                      | 2013              |
| ERS1594729 | PHEGAS020 | Yes                      | 2013 <sup>w</sup> |
| ERS1594730 | PHEGAS021 | Yes                      | 2013              |
| ERS1594731 | PHEGAS022 | Yes                      | 2013 <sup>L</sup> |
| ERS1594732 | PHEGAS023 | Yes                      | 2013              |
| ERS1594733 | PHEGAS024 | Yes                      | 2013              |
| ERS1594734 | PHEGAS025 | Yes                      | 2013              |
| ERS1594735 | PHEGAS026 | Yes                      | 2013 <sup>L</sup> |
| ERS1594736 | PHEGAS027 | Yes                      | 2013              |
| ERS1594737 | PHEGAS028 | Yes                      | 2013              |
| ERS1594738 | PHEGAS029 | Yes                      | 2013              |
| ERS1594739 | PHEGAS030 | Yes                      | 2013              |
| ERS1594740 | PHEGAS031 | Yes                      | 2013              |
| ERS1594741 | PHEGAS032 | Yes                      | 2013              |
| ERS1594742 | PHEGAS033 | Yes                      | 2013              |
| ERS1594743 | PHEGAS034 | Yes                      | 2013              |
| ERS1594744 | PHEGAS035 | Yes                      | 2013              |

|            |           |     |                   |
|------------|-----------|-----|-------------------|
| ERS1594745 | PHEGAS036 | Yes | 2013              |
| ERS1594746 | PHEGAS037 | Yes | 2013              |
| ERS1594747 | PHEGAS038 | Yes | 2013              |
| ERS1594748 | PHEGAS039 | Yes | 2013              |
| ERS1594749 | PHEGAS040 | Yes | 2013              |
| ERS1594750 | PHEGAS041 | Yes | 2013              |
| ERS1594751 | PHEGAS042 | Yes | 2013 <sup>w</sup> |
| ERS1594752 | PHEGAS043 | Yes | 2013              |
| ERS1594753 | PHEGAS044 | Yes | 2013              |
| ERS1594754 | PHEGAS045 | Yes | 2013              |
| ERS1594755 | PHEGAS046 | Yes | 2013              |
| ERS1594756 | PHEGAS047 | Yes | 2013              |
| ERS1594757 | PHEGAS048 | Yes | 2013              |
| ERS1594758 | PHEGAS049 | Yes | 2013              |
| ERS1594759 | PHEGAS050 | Yes | 2013 <sup>L</sup> |
| ERS1594760 | PHEGAS051 | Yes | 2013              |
| ERS1594762 | PHEGAS053 | Yes | 2013              |
| ERS1594763 | PHEGAS054 | Yes | 2013              |
| ERS1594764 | PHEGAS055 | Yes | 2013              |
| ERS1594765 | PHEGAS056 | Yes | 2013              |
| ERS1594766 | PHEGAS057 | Yes | 2013              |
| ERS1594767 | PHEGAS058 | Yes | 2013              |
| ERS1594768 | PHEGAS059 | Yes | 2013              |
| ERS1594769 | PHEGAS060 | Yes | 2013              |
| ERS1594770 | PHEGAS061 | Yes | 2013              |
| ERS1594771 | PHEGAS062 | Yes | 2013              |
| ERS1594772 | PHEGAS063 | Yes | 2013              |
| ERS1594773 | PHEGAS064 | No  | 2013              |
| ERS1594774 | PHEGAS065 | No  | 2013              |
| ERS1594775 | PHEGAS066 | Yes | 2013              |
| ERS1594776 | PHEGAS067 | Yes | 2013 <sup>w</sup> |
| ERS1594777 | PHEGAS068 | Yes | 2013              |
| ERS1594778 | PHEGAS069 | Yes | 2013              |
| ERS1594779 | PHEGAS070 | Yes | 2013              |
| ERS1594780 | PHEGAS071 | Yes | 2013              |
| ERS1594781 | PHEGAS072 | Yes | 2013              |
| ERS1594782 | PHEGAS073 | Yes | 2013              |
| ERS1594783 | PHEGAS074 | Yes | 2013              |
| ERS1594784 | PHEGAS075 | Yes | 2013              |

|            |           |     |                   |
|------------|-----------|-----|-------------------|
| ERS1594785 | PHEGAS076 | Yes | 2013              |
| ERS1594786 | PHEGAS077 | Yes | 2013              |
| ERS1594787 | PHEGAS078 | Yes | 2013 <sup>W</sup> |
| ERS1594788 | PHEGAS079 | No  | 2013              |
| ERS1594805 | PHEGAS080 | Yes | 2013              |
| ERS1594807 | PHEGAS082 | Yes | 2013              |
| ERS1594808 | PHEGAS083 | Yes | 2013 <sup>L</sup> |
| ERS1594809 | PHEGAS084 | Yes | 2013              |
| ERS1594810 | PHEGAS085 | Yes | 2013              |
| ERS1594811 | PHEGAS086 | No  | 2013              |
| ERS1594812 | PHEGAS087 | Yes | 2013              |
| ERS1594813 | PHEGAS088 | Yes | 2013              |
| ERS1594814 | PHEGAS089 | Yes | 2013              |
| ERS1594815 | PHEGAS090 | Yes | 2013              |
| ERS1594816 | PHEGAS091 | Yes | 2013              |
| ERS1594817 | PHEGAS092 | Yes | 2013              |
| ERS1594818 | PHEGAS093 | Yes | 2013              |
| ERS1594819 | PHEGAS094 | Yes | 2013              |
| ERS1594821 | PHEGAS096 | Yes | 2013              |
| ERS1594822 | PHEGAS097 | Yes | 2013              |
| ERS1594823 | PHEGAS098 | Yes | 2013              |
| ERS1594824 | PHEGAS099 | Yes | 2013              |
| ERS1594825 | PHEGAS100 | Yes | 2013              |
| ERS1594826 | PHEGAS101 | Yes | 2013              |
| ERS1594827 | PHEGAS102 | Yes | 2013              |
| ERS1594828 | PHEGAS103 | Yes | 2013              |
| ERS1594829 | PHEGAS104 | Yes | 2013              |
| ERS1594830 | PHEGAS105 | Yes | 2013 <sup>L</sup> |
| ERS1594831 | PHEGAS106 | Yes | 2013              |
| ERS1594832 | PHEGAS107 | No  | 2013              |
| ERS1594833 | PHEGAS108 | Yes | 2013              |
| ERS1594834 | PHEGAS109 | No  | 2013              |
| ERS1594835 | PHEGAS110 | Yes | 2013              |
| ERS1594836 | PHEGAS111 | Yes | 2013              |
| ERS1594837 | PHEGAS112 | Yes | 2013              |
| ERS1594838 | PHEGAS113 | Yes | 2013              |
| ERS1594839 | PHEGAS114 | Yes | 2013              |
| ERS1594840 | PHEGAS115 | Yes | 2013              |
| ERS1594841 | PHEGAS116 | Yes | 2013              |

|            |           |     |                   |
|------------|-----------|-----|-------------------|
| ERS1594842 | PHEGAS117 | Yes | 2013              |
| ERS1594843 | PHEGAS118 | Yes | 2013              |
| ERS1594844 | PHEGAS119 | Yes | 2013              |
| ERS1594845 | PHEGAS120 | Yes | 2013              |
| ERS1594846 | PHEGAS121 | Yes | 2013              |
| ERS1594847 | PHEGAS122 | Yes | 2013              |
| ERS1594848 | PHEGAS123 | Yes | 2013              |
| ERS1594849 | PHEGAS124 | Yes | 2013              |
| ERS1594850 | PHEGAS125 | Yes | 2013              |
| ERS1594851 | PHEGAS126 | Yes | 2013              |
| ERS1594852 | PHEGAS127 | Yes | 2013              |
| ERS1594853 | PHEGAS128 | Yes | 2013              |
| ERS1594854 | PHEGAS129 | Yes | 2013              |
| ERS1594855 | PHEGAS130 | Yes | 2013              |
| ERS1594858 | PHEGAS131 | Yes | 2013              |
| ERS1594859 | PHEGAS132 | Yes | 2013              |
| ERS1594860 | PHEGAS133 | Yes | 2013              |
| ERS1594861 | PHEGAS134 | Yes | 2013              |
| ERS1594862 | PHEGAS135 | No  | 2013              |
| ERS1594863 | PHEGAS136 | Yes | 2013              |
| ERS1594864 | PHEGAS137 | Yes | 2013              |
| ERS1594856 | PHEGAS138 | Yes | 2013              |
| ERS1594865 | PHEGAS140 | Yes | 2013              |
| ERS1594866 | PHEGAS141 | Yes | 2013 <sup>w</sup> |
| ERS1594867 | PHEGAS142 | Yes | 2013              |
| ERS1594868 | PHEGAS143 | Yes | 2013              |
| ERS1594869 | PHEGAS144 | Yes | 2013              |
| ERS1594870 | PHEGAS145 | Yes | 2013              |
| ERS1594871 | PHEGAS146 | Yes | 2013              |
| ERS1594872 | PHEGAS147 | Yes | 2013              |
| ERS1594873 | PHEGAS148 | Yes | 2013              |
| ERS1594874 | PHEGAS149 | Yes | 2013              |
| ERS1594875 | PHEGAS150 | Yes | 2013              |
| ERS1594876 | PHEGAS151 | Yes | 2013              |
| ERS1594877 | PHEGAS152 | Yes | 2013              |
| ERS1594878 | PHEGAS153 | Yes | 2013              |
| ERS1594879 | PHEGAS154 | No  | 2013              |
| ERS1594880 | PHEGAS155 | No  | 2013              |
| ERS1594881 | PHEGAS156 | Yes | 2013              |



|            |           |     |                   |
|------------|-----------|-----|-------------------|
| ERS1594882 | PHEGAS157 | Yes | 2013              |
| ERS1594883 | PHEGAS158 | Yes | 2013              |
| ERS1594789 | PHEGAS159 | Yes | 2013              |
| ERS1594790 | PHEGAS160 | Yes | 2013 <sup>L</sup> |
| ERS1594791 | PHEGAS161 | Yes | 2013              |
| ERS1594792 | PHEGAS162 | Yes | 2013              |
| ERS1594793 | PHEGAS163 | Yes | 2013              |
| ERS1594794 | PHEGAS164 | Yes | 2013              |
| ERS1594795 | PHEGAS165 | Yes | 2013 <sup>L</sup> |
| ERS1594796 | PHEGAS166 | Yes | 2013              |
| ERS1594797 | PHEGAS167 | Yes | 2013              |
| ERS1594798 | PHEGAS168 | Yes | 2013              |
| ERS1594799 | PHEGAS169 | Yes | 2013              |
| ERS1594800 | PHEGAS170 | No  | 2013              |
| ERS1594801 | PHEGAS171 | Yes | 2013              |
| ERS1594802 | PHEGAS172 | Yes | 2013              |
| ERS1594803 | PHEGAS173 | Yes | 2013 <sup>W</sup> |
| ERS1594804 | PHEGAS174 | Yes | 2013              |
| ERS1594884 | PHEGAS175 | Yes | 2013              |
| ERS1594885 | PHEGAS176 | Yes | 2013              |
| ERS1594886 | PHEGAS177 | Yes | 2013              |
| ERS1594888 | PHEGAS178 | Yes | 2013              |
| ERS1594889 | PHEGAS179 | Yes | 2013              |
| ERS1594890 | PHEGAS180 | Yes | 2013              |
| ERS1594891 | PHEGAS181 | Yes | 2013              |
| ERS1594892 | PHEGAS182 | Yes | 2013              |
| ERS1594893 | PHEGAS183 | Yes | 2013              |
| ERS1594894 | PHEGAS184 | Yes | 2013              |
| ERS1594887 | PHEGAS185 | Yes | 2013              |
| ERS1594895 | PHEGAS186 | Yes | 2013              |
| ERS1594896 | PHEGAS187 | Yes | 2013              |
| ERS1594897 | PHEGAS188 | Yes | 2013              |
| ERS1594898 | PHEGAS189 | Yes | 2013              |
| ERS1594899 | PHEGAS190 | Yes | 2013              |
| ERS1595155 | PHEGAS196 | Yes | 2013 <sup>L</sup> |
| ERS1595156 | PHEGAS197 | Yes | 2016              |
| ERS1595158 | PHEGAS198 | Yes | 2016 <sup>L</sup> |
| ERS1595162 | PHEGAS200 | Yes | 2016              |
| ERS1595164 | PHEGAS201 | Yes | 2016              |

|            |           |     |                   |
|------------|-----------|-----|-------------------|
| ERS1595166 | PHEGAS202 | No  | 2016              |
| ERS1595167 | PHEGAS203 | Yes | 2016              |
| ERS1595169 | PHEGAS204 | Yes | 2016              |
| ERS1595172 | PHEGAS206 | Yes | 2016 <sup>L</sup> |
| ERS1594979 | PHEGAS207 | Yes | 2016              |
| ERS1594980 | PHEGAS208 | Yes | 2016              |
| ERS1594981 | PHEGAS209 | Yes | 2016              |
| ERS1594982 | PHEGAS210 | Yes | 2016              |
| ERS1594983 | PHEGAS211 | Yes | 2016              |
| ERS1594984 | PHEGAS212 | Yes | 2016              |
| ERS1594985 | PHEGAS213 | Yes | 2016              |
| ERS1594986 | PHEGAS214 | Yes | 2016              |
| ERS1594987 | PHEGAS215 | Yes | 2016              |
| ERS1594988 | PHEGAS216 | Yes | 2016              |
| ERS1594989 | PHEGAS217 | Yes | 2016              |
| ERS1594990 | PHEGAS218 | Yes | 2016              |
| ERS1594991 | PHEGAS219 | No  | 2016              |
| ERS1594992 | PHEGAS220 | Yes | 2016              |
| ERS1594993 | PHEGAS221 | Yes | 2016              |
| ERS1594994 | PHEGAS222 | Yes | 2016              |
| ERS1595116 | PHEGAS223 | Yes | 2016              |
| ERS1595118 | PHEGAS224 | Yes | 2016              |
| ERS1595119 | PHEGAS225 | Yes | 2016              |
| ERS1595121 | PHEGAS226 | Yes | 2016              |
| ERS1595123 | PHEGAS227 | Yes | 2016              |
| ERS1595124 | PHEGAS228 | Yes | 2016              |
| ERS1595126 | PHEGAS229 | Yes | 2016              |
| ERS1595128 | PHEGAS230 | Yes | 2016              |
| ERS1595129 | PHEGAS231 | Yes | 2016              |
| ERS1595131 | PHEGAS232 | Yes | 2016              |
| ERS1595133 | PHEGAS233 | Yes | 2016              |
| ERS1595134 | PHEGAS234 | Yes | 2016              |
| ERS1595136 | PHEGAS235 | Yes | 2016              |
| ERS1595138 | PHEGAS236 | Yes | 2016              |
| ERS1595139 | PHEGAS237 | Yes | 2016              |
| ERS1594900 | PHEGAS238 | Yes | 2016              |
| ERS1594901 | PHEGAS239 | Yes | 2016              |
| ERS1594902 | PHEGAS240 | Yes | 2016              |
| ERS1594903 | PHEGAS241 | Yes | 2016              |

|            |           |     |                   |
|------------|-----------|-----|-------------------|
| ERS1594904 | PHEGAS242 | Yes | 2016              |
| ERS1594905 | PHEGAS243 | Yes | 2016              |
| ERS1594906 | PHEGAS244 | Yes | 2016              |
| ERS1594907 | PHEGAS245 | Yes | 2016              |
| ERS1594908 | PHEGAS246 | No  | 2016              |
| ERS1594909 | PHEGAS247 | Yes | 2016              |
| ERS1594910 | PHEGAS248 | Yes | 2016 <sup>w</sup> |
| ERS1594911 | PHEGAS249 | Yes | 2013              |
| ERS1594912 | PHEGAS250 | Yes | 2016              |
| ERS1594913 | PHEGAS251 | Yes | 2016              |
| ERS1594914 | PHEGAS252 | Yes | 2016              |
| ERS1594915 | PHEGAS253 | Yes | 2016              |
| ERS1594916 | PHEGAS254 | Yes | 2016              |
| ERS1594917 | PHEGAS255 | Yes | 2016              |
| ERS1594918 | PHEGAS256 | Yes | 2016              |
| ERS1594919 | PHEGAS257 | No  | 2016              |
| ERS1594920 | PHEGAS258 | No  | 2016              |
| ERS1594921 | PHEGAS259 | Yes | 2016              |
| ERS1594922 | PHEGAS260 | Yes | 2013              |
| ERS1594923 | PHEGAS261 | Yes | 2016              |
| ERS1594924 | PHEGAS262 | Yes | 2016              |
| ERS1594925 | PHEGAS263 | Yes | 2016              |
| ERS1594926 | PHEGAS264 | Yes | 2013              |
| ERS1594927 | PHEGAS265 | Yes | 2016              |
| ERS1594928 | PHEGAS266 | Yes | 2016              |
| ERS1594929 | PHEGAS267 | Yes | 2016              |
| ERS1594930 | PHEGAS268 | Yes | 2016              |
| ERS1594931 | PHEGAS269 | Yes | 2016              |
| ERS1594932 | PHEGAS270 | Yes | 2016              |
| ERS1594933 | PHEGAS271 | Yes | 2016              |
| ERS1594934 | PHEGAS272 | Yes | 2016              |
| ERS1594935 | PHEGAS273 | Yes | 2016              |
| ERS1594936 | PHEGAS274 | Yes | 2016              |
| ERS1594937 | PHEGAS275 | Yes | 2016              |
| ERS1594938 | PHEGAS276 | Yes | 2016              |
| ERS1594939 | PHEGAS277 | Yes | 2016              |
| ERS1594940 | PHEGAS278 | Yes | 2016              |
| ERS1594941 | PHEGAS279 | Yes | 2016              |
| ERS1594942 | PHEGAS280 | Yes | 2016              |

|            |           |     |                   |
|------------|-----------|-----|-------------------|
| ERS1594943 | PHEGAS281 | Yes | 2016              |
| ERS1594944 | PHEGAS282 | Yes | 2016              |
| ERS1594945 | PHEGAS283 | Yes | 2016              |
| ERS1594946 | PHEGAS284 | Yes | 2016              |
| ERS1594947 | PHEGAS285 | Yes | 2016              |
| ERS1594948 | PHEGAS286 | Yes | 2016              |
| ERS1594949 | PHEGAS287 | Yes | 2016              |
| ERS1594950 | PHEGAS288 | Yes | 2016              |
| ERS1594951 | PHEGAS289 | Yes | 2016              |
| ERS1594952 | PHEGAS290 | Yes | 2016              |
| ERS1594953 | PHEGAS291 | No  | 2016              |
| ERS1594954 | PHEGAS292 | Yes | 2016              |
| ERS1594955 | PHEGAS293 | Yes | 2016              |
| ERS1594956 | PHEGAS294 | Yes | 2016              |
| ERS1594957 | PHEGAS295 | Yes | 2016              |
| ERS1594958 | PHEGAS296 | Yes | 2016              |
| ERS1594959 | PHEGAS297 | Yes | 2016              |
| ERS1594960 | PHEGAS298 | Yes | 2016              |
| ERS1594961 | PHEGAS299 | Yes | 2016              |
| ERS1594962 | PHEGAS300 | Yes | 2016              |
| ERS1594963 | PHEGAS301 | Yes | 2016 <sup>L</sup> |
| ERS1594964 | PHEGAS302 | Yes | 2016              |
| ERS1594965 | PHEGAS303 | Yes | 2016              |
| ERS1594966 | PHEGAS304 | Yes | 2016              |
| ERS1594967 | PHEGAS305 | Yes | 2016              |
| ERS1594968 | PHEGAS306 | Yes | 2016              |
| ERS1594969 | PHEGAS307 | Yes | 2016              |
| ERS1594970 | PHEGAS308 | Yes | 2016              |
| ERS1594971 | PHEGAS309 | Yes | 2016              |
| ERS1594972 | PHEGAS310 | Yes | 2016              |
| ERS1594973 | PHEGAS311 | Yes | 2016              |
| ERS1594974 | PHEGAS312 | Yes | 2016              |
| ERS1594975 | PHEGAS313 | Yes | 2016 <sup>L</sup> |
| ERS1594976 | PHEGAS314 | Yes | 2016              |
| ERS1594977 | PHEGAS315 | Yes | 2016              |
| ERS1594978 | PHEGAS316 | Yes | 2016              |
| ERS1595187 | PHEGAS317 | Yes | 2016 <sup>L</sup> |
| ERS1595189 | PHEGAS318 | Yes | 2016              |
| ERS1595191 | PHEGAS319 | Yes | 2016              |

|            |           |     |                   |
|------------|-----------|-----|-------------------|
| ERS1595176 | PHEGAS320 | Yes | 2016              |
| ERS1595193 | PHEGAS321 | Yes | 2016              |
| ERS1595195 | PHEGAS322 | Yes | 2016              |
| ERS1595196 | PHEGAS323 | Yes | 2016              |
| ERS1595200 | PHEGAS325 | Yes | 2016              |
| ERS1595201 | PHEGAS326 | Yes | 2016              |
| ERS1595203 | PHEGAS327 | Yes | 2016              |
| ERS1595184 | PHEGAS328 | Yes | 2016              |
| ERS1595205 | PHEGAS329 | Yes | 2016              |
| ERS1595178 | PHEGAS330 | Yes | 2016              |
| ERS1595179 | PHEGAS331 | Yes | 2016              |
| ERS1595207 | PHEGAS332 | Yes | 2016              |
| ERS1595208 | PHEGAS333 | Yes | 2016              |
| ERS1595210 | PHEGAS335 | Yes | 2016              |
| ERS1595186 | PHEGAS336 | Yes | 2016              |
| ERS1595183 | PHEGAS337 | Yes | 2016              |
| ERS1595213 | PHEGAS339 | Yes | 2016              |
| ERS1595215 | PHEGAS340 | Yes | 2016              |
| ERS1595217 | PHEGAS341 | Yes | 2016              |
| ERS1595220 | PHEGAS343 | Yes | 2016              |
| ERS1595222 | PHEGAS344 | Yes | 2016              |
| ERS1595224 | PHEGAS345 | Yes | 2016              |
| ERS1595225 | PHEGAS346 | Yes | 2016 <sup>L</sup> |
| ERS1595227 | PHEGAS347 | Yes | 2016              |
| ERS1595229 | PHEGAS348 | Yes | 2016              |
| ERS1595231 | PHEGAS349 | Yes | 2016              |
| ERS1595232 | PHEGAS350 | Yes | 2016              |
| ERS1595234 | PHEGAS351 | Yes | 2016              |
| ERS1595235 | PHEGAS352 | Yes | 2016              |
| ERS1595237 | PHEGAS353 | Yes | 2016              |
| ERS1595239 | PHEGAS354 | Yes | 2016              |
| ERS1595241 | PHEGAS355 | Yes | 2016 <sup>L</sup> |
| ERS1595242 | PHEGAS356 | Yes | 2016 <sup>L</sup> |
| ERS1595244 | PHEGAS357 | Yes | 2016              |
| ERS1595246 | PHEGAS358 | Yes | 2016              |
| ERS1595248 | PHEGAS359 | Yes | 2016              |
| ERS1595250 | PHEGAS360 | Yes | 2016              |
| ERS1595251 | PHEGAS361 | Yes | 2016              |
| ERS1595253 | PHEGAS362 | Yes | 2016 <sup>W</sup> |

|            |           |     |                   |
|------------|-----------|-----|-------------------|
| ERS1595257 | PHEGAS364 | Yes | 2016 <sup>L</sup> |
| ERS1595260 | PHEGAS366 | Yes | 2016              |
| ERS1595261 | PHEGAS367 | Yes | 2016              |
| ERS1595263 | PHEGAS368 | Yes | 2016 <sup>L</sup> |
| ERS1595266 | PHEGAS370 | Yes | 2016              |
| ERS1595274 | PHEGAS374 | Yes | 2016              |
| ERS1595276 | PHEGAS375 | Yes | 2016              |
| ERS1595279 | PHEGAS377 | Yes | 2016              |
| ERS1595280 | PHEGAS378 | Yes | 2016              |
| ERS1595282 | PHEGAS379 | Yes | 2016              |
| ERS1595284 | PHEGAS380 | Yes | 2016              |
| ERS1595285 | PHEGAS381 | Yes | 2016              |
| ERS1595289 | PHEGAS383 | Yes | 2016              |
| ERS1595290 | PHEGAS384 | Yes | 2016              |
| ERS1595292 | PHEGAS385 | No  | 2016              |
| ERS1595293 | PHEGAS386 | Yes | 2016              |
| ERS1595295 | PHEGAS387 | Yes | 2016              |
| ERS1595297 | PHEGAS388 | Yes | 2016              |
| ERS1595298 | PHEGAS389 | Yes | 2016 <sup>W</sup> |
| ERS1595300 | PHEGAS390 | Yes | 2016              |
| ERS1595302 | PHEGAS391 | Yes | 2016              |
| ERS1595305 | PHEGAS393 | Yes | 2016              |
| ERS1595307 | PHEGAS394 | No  | 2016              |
| ERS1595308 | PHEGAS395 | Yes | 2016              |
| ERS1594996 | PHEGAS397 | Yes | 2016              |
| ERS1594997 | PHEGAS398 | Yes | 2016              |
| ERS1594999 | PHEGAS400 | Yes | 2016              |
| ERS1595000 | PHEGAS401 | Yes | 2016              |
| ERS1595001 | PHEGAS402 | Yes | 2016              |
| ERS1595002 | PHEGAS403 | Yes | 2016              |
| ERS1595005 | PHEGAS406 | Yes | 2016              |
| ERS1595007 | PHEGAS408 | Yes | 2016              |
| ERS1595008 | PHEGAS409 | Yes | 2016              |
| ERS1595009 | PHEGAS410 | Yes | 2016              |
| ERS1595010 | PHEGAS411 | Yes | 2016 <sup>L</sup> |
| ERS1595011 | PHEGAS412 | Yes | 2016              |
| ERS1595012 | PHEGAS413 | Yes | 2016              |
| ERS1595013 | PHEGAS414 | Yes | 2016              |
| ERS1595014 | PHEGAS415 | Yes | 2016              |

|            |           |     |                   |
|------------|-----------|-----|-------------------|
| ERS1595015 | PHEGAS416 | Yes | 2016              |
| ERS1595016 | PHEGAS417 | Yes | 2016              |
| ERS1595017 | PHEGAS418 | Yes | 2016              |
| ERS1595018 | PHEGAS419 | Yes | 2016              |
| ERS1595019 | PHEGAS420 | Yes | 2016              |
| ERS1595021 | PHEGAS422 | Yes | 2016              |
| ERS1595022 | PHEGAS423 | Yes | 2016              |
| ERS1595023 | PHEGAS424 | Yes | 2016              |
| ERS1595024 | PHEGAS425 | Yes | 2016              |
| ERS1595025 | PHEGAS426 | Yes | 2016              |
| ERS1595027 | PHEGAS428 | Yes | 2016              |
| ERS1595028 | PHEGAS429 | Yes | 2016              |
| ERS1595029 | PHEGAS430 | Yes | 2016              |
| ERS1595030 | PHEGAS431 | Yes | 2016              |
| ERS1595031 | PHEGAS432 | Yes | 2016 <sup>L</sup> |
| ERS1595032 | PHEGAS433 | Yes | 2016              |
| ERS1595033 | PHEGAS434 | Yes | 2016 <sup>W</sup> |
| ERS1595034 | PHEGAS435 | Yes | 2016              |
| ERS1595035 | PHEGAS436 | Yes | 2016              |
| ERS1595036 | PHEGAS437 | Yes | 2016 <sup>W</sup> |
| ERS1595037 | PHEGAS438 | Yes | 2016              |
| ERS1595038 | PHEGAS439 | Yes | 2016 <sup>L</sup> |
| ERS1595039 | PHEGAS440 | Yes | 2016              |
| ERS1595040 | PHEGAS441 | Yes | 2016 <sup>L</sup> |
| ERS1595041 | PHEGAS442 | Yes | 2016              |
| ERS1595042 | PHEGAS443 | Yes | 2016              |
| ERS1595043 | PHEGAS444 | No  | 2016              |
| ERS1595045 | PHEGAS445 | Yes | 2016              |
| ERS1595046 | PHEGAS446 | Yes | 2016              |
| ERS1595048 | PHEGAS447 | Yes | 2016              |
| ERS1595049 | PHEGAS448 | Yes | 2016              |
| ERS1595051 | PHEGAS449 | Yes | 2016              |
| ERS1595053 | PHEGAS450 | Yes | 2016              |
| ERS1595054 | PHEGAS451 | Yes | 2016 <sup>L</sup> |
| ERS1595058 | PHEGAS453 | Yes | 2016              |
| ERS1595059 | PHEGAS454 | Yes | 2016              |
| ERS1595061 | PHEGAS455 | Yes | 2016              |
| ERS1595062 | PHEGAS456 | Yes | 2016              |
| ERS1595064 | PHEGAS457 | Yes | 2016              |

|            |           |     |                   |
|------------|-----------|-----|-------------------|
| ERS1595066 | PHEGAS458 | Yes | 2016              |
| ERS1595067 | PHEGAS459 | Yes | 2016              |
| ERS1595069 | PHEGAS460 | Yes | 2016              |
| ERS1595071 | PHEGAS461 | Yes | 2016 <sup>w</sup> |
| ERS1595072 | PHEGAS462 | Yes | 2016              |
| ERS1595074 | PHEGAS463 | Yes | 2016              |
| ERS1595076 | PHEGAS464 | Yes | 2016              |
| ERS1595077 | PHEGAS465 | Yes | 2016              |
| ERS1595079 | PHEGAS466 | Yes | 2016              |
| ERS1595081 | PHEGAS467 | Yes | 2016              |
| ERS1595082 | PHEGAS468 | Yes | 2016              |
| ERS1595084 | PHEGAS469 | Yes | 2016              |
| ERS1595086 | PHEGAS470 | Yes | 2016              |
| ERS1595088 | PHEGAS471 | No  | 2016              |
| ERS1595089 | PHEGAS472 | Yes | 2013              |
| ERS1595091 | PHEGAS473 | Yes | 2013 <sup>w</sup> |
| ERS1595093 | PHEGAS474 | Yes | 2013              |
| ERS1595094 | PHEGAS475 | Yes | 2016              |
| ERS1595096 | PHEGAS476 | Yes | 2016              |
| ERS1595113 | PHEGAS477 | Yes | 2016              |
| ERS1595114 | PHEGAS478 | Yes | 2016              |

104  
105  
106  
107  
108  
  
109  
  
110  
  
111

<sup>L</sup> denotes isolates from London  
<sup>w</sup> denotes isolates from Wales  
Sequences were used in Figures 4, 5, S3-5



112 **Supplementary table 4: Previously sequenced invasive and sterile site *emm1* *S. pyogenes* strains**  
 113 **isolated from UK, March-May 2014-2015 used in comparative phylogenetic analysis (n=127)<sup>1</sup>**

114

| ENA        | Isolate    | Year              |
|------------|------------|-------------------|
| ERR1735326 | GASEMM0282 | 2014              |
| ERR1734716 | GASEMM0286 | 2014              |
| ERR1734694 | GASEMM0288 | 2014              |
| ERR1734317 | GASEMM0296 | 2014              |
| ERR1734401 | GASEMM0321 | 2014              |
| ERR1734888 | GASEMM0325 | 2014              |
| ERR1732999 | GASEMM0330 | 2014              |
| ERR1732882 | GASEMM0341 | 2014              |
| ERR1734868 | GASEMM0350 | 2014              |
| ERR1732487 | GASEMM0351 | 2014              |
| ERR1734992 | GASEMM0398 | 2014              |
| ERR1733933 | GASEMM0407 | 2014              |
| ERR1733306 | GASEMM0408 | 2014              |
| ERR1735043 | GASEMM0423 | 2014              |
| ERR1734816 | GASEMM0500 | 2014 <sup>†</sup> |
| ERR1734756 | GASEMM0505 | 2014              |
| ERR1735004 | GASEMM0506 | 2014              |
| ERR1732742 | GASEMM0507 | 2014              |
| ERR1733329 | GASEMM0511 | 2014              |
| ERR1732864 | GASEMM0525 | 2014              |
| ERR1733180 | GASEMM0545 | 2014              |
| ERR1732631 | GASEMM0557 | 2014              |
| ERR1733571 | GASEMM0567 | 2014              |
| ERR1735458 | GASEMM0617 | 2014              |
| ERR1734831 | GASEMM0623 | 2014 <sup>†</sup> |
| ERR1733026 | GASEMM0628 | 2014              |
| ERR1733140 | GASEMM0629 | 2014              |
| ERR1732584 | GASEMM0632 | 2014              |
| ERR1734543 | GASEMM0633 | 2014              |
| ERR1734818 | GASEMM0659 | 2014              |
| ERR1734600 | GASEMM0699 | 2014              |
| ERR1733043 | GASEMM0700 | 2014 <sup>†</sup> |
| ERR1733748 | GASEMM0706 | 2014              |
| ERR1735013 | GASEMM0785 | 2014              |
| ERR1733362 | GASEMM0832 | 2014              |

|            |            |                   |
|------------|------------|-------------------|
| ERR1732979 | GASEMM0835 | 2014              |
| ERR1733107 | GASEMM0848 | 2014              |
| ERR1735413 | GASEMM0883 | 2014              |
| ERR1734302 | GASEMM0902 | 2014              |
| ERR1734359 | GASEMM0936 | 2014              |
| ERR1734874 | GASEMM0947 | 2014              |
| ERR1733307 | GASEMM0964 | 2014              |
| ERR1734282 | GASEMM1017 | 2014              |
| ERR1732733 | GASEMM1027 | 2014              |
| ERR1732554 | GASEMM1030 | 2014              |
| ERR1733246 | GASEMM1154 | 2014 <sup>+</sup> |
| ERR1734285 | GASEMM1246 | 2014              |
| ERR1734445 | GASEMM2528 | 2015              |
| ERR1735332 | GASEMM2530 | 2015              |
| ERR1732875 | GASEMM2538 | 2015              |
| ERR1734262 | GASEMM2545 | 2015 <sup>+</sup> |
| ERR1734038 | GASEMM2555 | 2015              |
| ERR1733093 | GASEMM2562 | 2015              |
| ERR1732547 | GASEMM2565 | 2015              |
| ERR1732552 | GASEMM2571 | 2015              |
| ERR1733202 | GASEMM2578 | 2015              |
| ERR1734314 | GASEMM2581 | 2015              |
| ERR1732721 | GASEMM2588 | 2015              |
| ERR1732654 | GASEMM2589 | 2015              |
| ERR1734593 | GASEMM2634 | 2015              |
| ERR1734957 | GASEMM2644 | 2015              |
| ERR1734174 | GASEMM2659 | 2015              |
| ERR1732585 | GASEMM2667 | 2015              |
| ERR1733511 | GASEMM2670 | 2015              |
| ERR1732667 | GASEMM2677 | 2015              |
| ERR1732894 | GASEMM2686 | 2015              |
| ERR1732670 | GASEMM2687 | 2015              |
| ERR1735158 | GASEMM2701 | 2015              |
| ERR1732988 | GASEMM2703 | 2015              |
| ERR1733986 | GASEMM2721 | 2015              |
| ERR1733384 | GASEMM2727 | 2015              |
| ERR1733241 | GASEMM2738 | 2015              |
| ERR1735044 | GASEMM2754 | 2015              |
| ERR1734897 | GASEMM2755 | 2015              |

|            |            |                   |
|------------|------------|-------------------|
| ERR1733013 | GASEMM2757 | 2015              |
| ERR1734726 | GASEMM2758 | 2015              |
| ERR1733235 | GASEMM2764 | 2015 <sup>L</sup> |
| ERR1733438 | GASEMM2765 | 2015              |
| ERR1735390 | GASEMM2777 | 2015              |
| ERR1732682 | GASEMM2781 | 2015              |
| ERR1733038 | GASEMM2789 | 2015              |
| ERR1733723 | GASEMM2799 | 2015              |
| ERR1734009 | GASEMM2804 | 2015              |
| ERR1733032 | GASEMM2810 | 2015 <sup>L</sup> |
| ERR1732766 | GASEMM2814 | 2015              |
| ERR1732756 | GASEMM2815 | 2015              |
| ERR1733919 | GASEMM2822 | 2015              |
| ERR1735263 | GASEMM2828 | 2015              |
| ERR1734229 | GASEMM2839 | 2015              |
| ERR1732779 | GASEMM2843 | 2015              |
| ERR1734880 | GASEMM2844 | 2015              |
| ERR1732792 | GASEMM2854 | 2015              |
| ERR1733155 | GASEMM2857 | 2015              |
| ERR1734254 | GASEMM2859 | 2015              |
| ERR1734463 | GASEMM2862 | 2015              |
| ERR1733051 | GASEMM2877 | 2015              |
| ERR1733227 | GASEMM2879 | 2015              |
| ERR1732439 | GASEMM2899 | 2015              |
| ERR1733240 | GASEMM2907 | 2015              |
| ERR1733629 | GASEMM2909 | 2015              |
| ERR1732524 | GASEMM2917 | 2015              |
| ERR1734790 | GASEMM2921 | 2015 <sup>L</sup> |
| ERR1733469 | GASEMM2927 | 2015              |
| ERR1735407 | GASEMM2929 | 2015              |
| ERR1734828 | GASEMM2934 | 2015              |
| ERR1732777 | GASEMM2938 | 2015              |
| ERR1732705 | GASEMM2943 | 2015              |
| ERR1734841 | GASEMM2944 | 2015              |
| ERR1734968 | GASEMM2954 | 2015              |
| ERR1734769 | GASEMM2961 | 2015              |
| ERR1735365 | GASEMM2963 | 2015              |
| ERR1732647 | GASEMM2969 | 2015              |
| ERR1734520 | GASEMM2970 | 2015              |

|            |            |      |
|------------|------------|------|
| ERR1732863 | GASEMM2971 | 2015 |
| ERR1733744 | GASEMM2972 | 2015 |
| ERR1733348 | GASEMM2978 | 2015 |
| ERR1734914 | GASEMM2982 | 2015 |
| ERR1734240 | GASEMM2983 | 2015 |
| ERR1734571 | GASEMM2984 | 2015 |
| ERR1732580 | GASEMM2987 | 2015 |
| ERR1734984 | GASEMM2995 | 2015 |
| ERR1733904 | GASEMM3002 | 2015 |
| ERR1734523 | GASEMM3007 | 2015 |
| ERR1735244 | GASEMM3017 | 2015 |
| ERR1733279 | GASEMM3019 | 2015 |
| ERR1733678 | GASEMM3027 | 2015 |
| ERR1735194 | GASEMM3028 | 2015 |

115 <sup>1</sup>Sequences were used in the analysis for Figures 4, 5, S3-5

116 <sup>L</sup> denotes London

117  
118  
119  
120  
121  
122  
123  
124  
125  
126  
127  
128  
129  
130  
131  
132  
133  
134  
135  
136  
137  
138  
139  
140  
141  
142  
143  
144  
145  
146

147 **Supplementary table 5. Genome sequences of *emm1* isolates used for longitudinal UK analysis and**  
 148 **comparative global phylogenetic analysis**  
 149

| Region of origin       | Reference                                                                                       |
|------------------------|-------------------------------------------------------------------------------------------------|
| UK (n=1240)            | This study n=581; n=610 <sup>1</sup> ; n=25 <sup>2</sup> ; n=24 <sup>3</sup>                    |
| North America (n=720)  | n=316 <sup>4</sup> ; n=404 (USA, n=381; Canada n=23) <sup>5</sup>                               |
| Nordic regions (n=806) | n=806 (Denmark, n=269; Sweden, n=263; Finland, n=204; Iceland, n=16; Norway, n=54) <sup>5</sup> |
| South-east Asia (n=34) | n=34 (Hong Kong, n=18; China, n=16) <sup>6</sup>                                                |

150 Sequences of uncertain quality or origin were not used in the analysis.  
 151 Sequences from Kapatai *et al*<sup>1</sup> included UK isolates from a 14 month continuous period 2014-2015  
 152 Sequences from Turner *et al*<sup>2,3</sup> included isolates from England 2007-2012  
 153 Sequences from Nasser *et al*.<sup>5</sup> prior to 2005 were not included.  
 154  
 155  
 156  
 157  
 158  
 159  
 160  
 161  
 162  
 163  
 164  
 165  
 166  
 167  
 168  
 169  
 170  
 171  
 172  
 173  
 174  
 175  
 176  
 177  
 178  
 179  
 180  
 181  
 182  
 183  
 184  
 185  
 186  
 187  
 188  
 189

## 190 **Supplementary Methods**

191

192 **Isolate sampling.** Non-invasive *S. pyogenes* isolates were collected throughout each year 2009-2013.  
193 Dwindling in sample submissions 2009-2013, linked to practice and UK guideline change, rendered whole  
194 year collection operationally impractical. An unexpected increase in sample submissions in February 2014  
195 and alert regarding increasing scarlet fever notifications prompted collection during a fixed period March-  
196 May 2014 for operational reasons, and to ensure robust protocol adherence. For consistency, collection of  
197 non-invasive strains was undertaken in March-May of subsequent years 2015 and 2016.

198 Invasive isolates 2013-2016 were collected throughout each year by the Reference laboratory and all were  
199 *emm*-genotyped; invasive *emm1* isolates for sequencing were selected from March-May 2013 and March-  
200 May 2016 for consistency with the non-invasive strain collection and to focus on the season with maximum  
201 notifications of invasive disease. Sequences from 2014 and 2015 invasive isolates were previously reported<sup>1</sup>.  
202 Phylogenetic analysis and comparison of 552 sterile site invasive *emm1* isolates from 2013-2016 was limited  
203 to cases arising in March-May.

204 **Emm genotyping.** *S. pyogenes emm* sequencing was performed according to the protocol of the Centers for  
205 Diseases Control and Prevention ([www.cdc.gov/ncidod/biotech/strep/protocol\\_emmtype](http://www.cdc.gov/ncidod/biotech/strep/protocol_emmtype)).

206

207 **DNA extraction and genome sequencing.** Genomic DNA was extracted as described previously<sup>7</sup> or using  
208 Qiasymphony (Qiagen, Germany)<sup>8</sup>. Multiplexed DNA library preparation was conducted according to the  
209 Illumina protocol and sequencing was performed on an Illumina HiSeq 2000 (Illumina, USA) with 100-cycle  
210 paired-end runs. All genome sequence data generated in this study have been submitted to the European  
211 Nucleotide Archive (ENA) ([www.ebi.ac.uk/ena](http://www.ebi.ac.uk/ena)) under the accession numbers listed in Supplementary Tables  
212 S2 and S3.

213

214 **Genomic analysis.** Multilocus sequence typing by blast from de novo assemblies against PubMLST<sup>9</sup> was  
215 performed for all sequenced isolates, and *emm*-types were confirmed by *in-silico* PCR  
216 (<https://www.ebi.ac.uk/about/vertebrate-genomics/software/ipcress-manual>) followed by BLAST analysis  
217 using the CDC *emm*-typing database (<https://www2a.cdc.gov/ncidod/biotech/strepblast.asp>).  
218 SMALT (Wellcome Trust Sanger Institute) was used to map reads to the designated *emm1* reference strain  
219 MGAS5005 (NC\_007297). Concatenated SNPs in the core genome were used to construct a maximum-  
220 likelihood tree using RAxML<sup>10</sup>. Phylogenetic trees were generated and annotated using FigTree  
221 (<http://tree.bio.ed.ac.uk/software/figtree/>) and Dendroscope<sup>11</sup>. The global genetic context of strains collected  
222 during this study was elucidated by comparison with other published *S. pyogenes emm1* genomes collected  
223 from the USA, Europe and Asia<sup>1-6</sup>.

224 Pan-genome of 135 non-invasive *emm1* isolates was queried using Roary ([http://sanger-  
225 pathogens.github.io/Roary/](http://sanger-pathogens.github.io/Roary/))<sup>12</sup>. Regions of SNPs clustering and potential areas of recombination were  
226 investigated using Gubbins.<sup>13</sup>

227 All 135 sequenced non-invasive *emm1* isolates were tested for the presence and absence of acquired  
228 antimicrobial resistance genes using ARIBA<sup>14</sup> and using the SRST2 database ARGANNOT<sup>15</sup>.

229

230

231 **Quantitative real-time PCR.** RNA was extracted from *S. pyogenes* following 6 hours culture (37°C, 5%  
232 CO<sub>2</sub>) and converted to cDNA following DNase treatment with TurboDNafree (Ambion, Cambridgeshire  
233 UK) as described previously<sup>16</sup>. qRT-PCR was carried out for the *speA* gene (primers: *speA* F: 5'-  
234 GAGGGGTAACAAATCATGAAGG-3', *speA* R: 5'- TCAAATGATAGGCTTTGGATACC-3'), and  
235 expression data normalized to that of *proS* (primers: *proS* F: 5'-  
236 TGAGTTTATTATGAAAGACGGCTATAGTTTC-3', *proS* R: 5'-  
237 AATAGCTTCGTAAGCTTGACGATAATC-3') using a standard curve method as described previously<sup>16</sup>.

238

239 ***S. pyogenes* supernatant preparation and SpeA western blot.** *S. pyogenes* was cultured overnight in Todd-  
240 Hewitt Broth and supernatants were 0.2 µM filtered (Sartorius) then 5× concentrated using 10 kDa cutoff  
241 spin columns (Amicon). Total protein content of each sample was quantified using NanoDrop One

242 spectrophotometer (ThermoFisher). SDS-PAGE and western blotting were carried out as described  
243 previously<sup>17</sup>. SpeA concentrations in culture supernatants were quantified by densitometry by comparison  
244 with a standard curve of known concentrations of full length rSPEA (31kD with His-tag). Blots were probed  
245 with anti-rSpeA rabbit serum raised against a 17kD truncated rSPEA (1:1000) as described previously<sup>18</sup> and  
246 goat-anti rabbit-HRP secondary antibody (ThermoScientific). Blots were developed and densitometry  
247 performed using a Li-COR Odyssey Clx imaging system.

248  
249  
250

## 251 Reference List for Supplementary Material

252

- 253 1. Kapatai G, Coelho J, Platt S, Chalker VJ. Whole genome sequencing of group A Streptococcus:  
254 development and evaluation of an automated pipeline for emmgene typing. *PeerJ* 2017; **5**: e3226.
- 255 2. Turner CE, Bedford L, Brown NM, et al. Community outbreaks of group A Streptococcus  
256 revealed by genome sequencing. *Sci Rep* 2017; **7**(1): 8554.
- 257 3. Turner CE, Dryden M, Holden MT, et al. Molecular analysis of an outbreak of lethal  
258 postpartum sepsis caused by Streptococcus pyogenes. *J Clin Microbiol* 2013; **51**(7): 2089-95.
- 259 4. Chochua S, Metcalf BJ, Li Z, et al. Population and Whole Genome Sequence Based  
260 Characterization of Invasive Group A Streptococci Recovered in the United States during 2015. *MBio*  
261 2017; **8**(5).
- 262 5. Nasser W, Beres SB, Olsen RJ, et al. Evolutionary pathway to increased virulence and  
263 epidemic group A Streptococcus disease derived from 3,615 genome sequences. *Proc Natl Acad Sci U*  
264 *SA* 2014; **111**(17): E1768-76.
- 265 6. Ben Zakour NL, Davies MR, You Y, et al. Transfer of scarlet fever-associated elements into the  
266 group A Streptococcus M1T1 clone. *Sci Rep* 2015; **5**: 15877.
- 267 7. Pospiech A, Neumann B. A versatile quick-prep of genomic DNA from gram-positive bacteria.  
268 *Trends Genet* 1995; **11**(6): 217-8.
- 269 8. Chalker V, Jironkin A, Coelho J, et al. Genome analysis following a national increase in Scarlet  
270 Fever in England 2014. *BMC Genomics* 2017; **18**(1): 224.
- 271 9. Page AJ. Multilocus sequence typing by blast from de novo assemblies against PubMLST. *The*  
272 *Journal of Open Source Software* 2016; **8**(1).
- 273 10. Stamatakis A. RAxML version 8: a tool for phylogenetic analysis and post-analysis of large  
274 phylogenies. *Bioinformatics* 2014; **30**(9): 1312-3.
- 275 11. Huson DH, Richter DC, Rausch C, Dezulian T, Franz M, Rupp R. Dendroscope: An interactive  
276 viewer for large phylogenetic trees. *BMC Bioinformatics* 2007; **8**: 460.
- 277 12. Page AJ, Cummins CA, Hunt M, et al. Roary: rapid large-scale prokaryote pan genome  
278 analysis. *Bioinformatics*. 2015;**31**:3691–3693.
- 279 13. Croucher NJ, Page AJ, Connor TR, et al. Rapid phylogenetic analysis of large samples of  
280 recombinant bacterial whole genome sequences using Gubbins. *Nucleic Acids Res.* 2015;**43**:e15.
- 281 14. Hunt M, Mather AE, Sánchez-Busó L, et al. ARIBA: rapid antimicrobial resistance genotyping directly  
282 from sequencing reads. *Microb Genom.* 2017;**3**:e000131.
- 283 15. Inouye M, Dashnow H, Raven LA, et al. SRST2: Rapid genomic surveillance for public health and  
284 hospital microbiology labs. *Genome Med.* 2014;**6**:90.
- 285 16. Turner CE, Kurupati P, Jones MD, Edwards RJ, Sriskandan S. Emerging role of the interleukin-  
286 8 cleaving enzyme SpyCEP in clinical Streptococcus pyogenes infection. *J Infect Dis* 2009; **200**(4):  
287 555-63.
- 288 17. Lynskey NN, Goulding D, Gierula M, et al. RocA truncation underpins hyper-encapsulation,  
289 carriage longevity and transmissibility of serotype M18 group A streptococci. *PLoS Pathog* 2013;  
290 **9**(12): e1003842.
- 291 18. Sriskandan S, Unnikrishnan M, Krausz T, Cohen J. Molecular analysis of the role of  
292 streptococcal pyrogenic Exotoxin A (SPEA) in invasive soft-tissue infection resulting from  
293 Streptococcus pyogenes. *Mol Microbiol* 1999; **33**(4): 778-90.
